# Supplementary material
Source: ML conference proceedings conference paper supplement (https://proceedings.mlr.press/v97/feraud19a.html)
Supplement: Supplementary file [file feraud19a-supp.pdf]

## 7. Appendix

### 7.1. Positive mean-gap

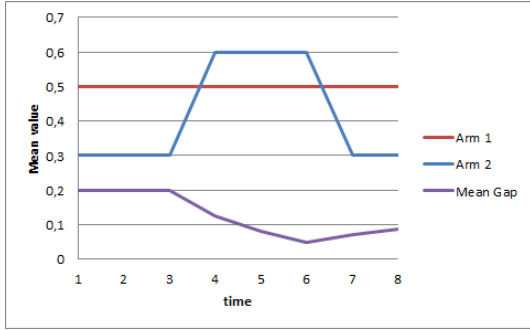

Figure 3: Mean gap versus time. Assumption 4 holds: the mean gap stays positive.

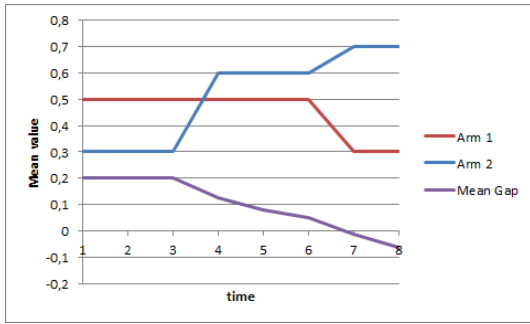

Figure 4: Mean gap versus time. Assumption 4 does not hold: a switch occurs a time 7.

Assumption 4 trivially holds when the mean rewards do not change. When the mean rewards change, Assumption 4 parts the small changes that do not imply a change of mean gap (see Figure 3) from major changes where the mean gap changes (see Figure 4). For more details see (Allesiardo et al, 2017).

### 7.2. Additional Experiments

MEDIAN ELIMINATION is designed to be order optimal in the worst case: its sample complexity is in  $O(K \log \frac{1}{\delta})$ . However, in practice it is clearly outperformed by SUCCESSIVE ELIMINATION or UGAPÉC on both problems (see Figures 5, 6).

### 7.3. Proofs

**Theorem 1.** *Using any ArmSelection subroutine, DECENTRALIZED ELIMINATION is an  $(\epsilon, \eta)$ -private algorithm, that finds an  $\epsilon$ -optimal arm with a failure probability  $\delta \leq \eta^{\lfloor \frac{\log \delta}{\log \eta} \rfloor}$  and that exchanges at most  $\lfloor \frac{\log \delta}{\log \eta} \rfloor K - 1$  messages.*

*Proof.* The proof of Theorem 1 is composed of three parts.

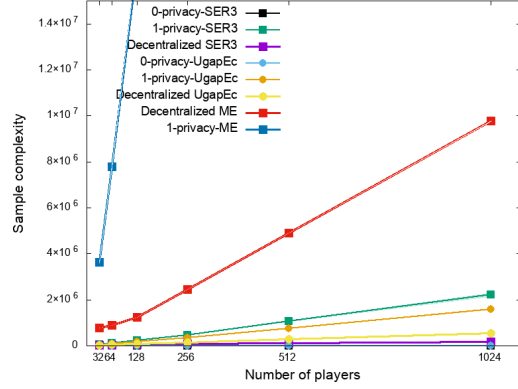

Figure 5: Problem 1: Uniform distribution of players

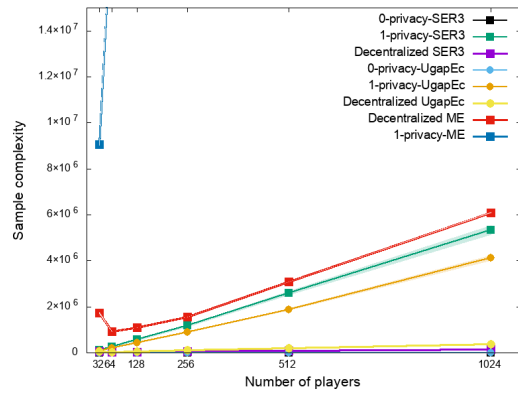

Figure 6: Problem 2: 50% of players generates 80% of events

**Part 1:  $(\epsilon, \eta)$ -privacy.** Let  $E_{l^n} = \{\mathcal{K}^n(l^n) \cap \mathcal{K}_\epsilon = \emptyset\}$  be the event denoting that there is no  $\epsilon$ -optimal arm in the remaining set of arm  $\mathcal{K}^n(l^n)$  at epoch  $l^n$ , and  $\neg E_{l^n}$  be the event denoting that there is at least an  $\epsilon$ -optimal arm in the remaining set of arm  $\mathcal{K}^n(l^n)$  at epoch  $l^n$ .

As DECENTRALIZED EXPLORATION ( $\mathcal{A}$ ) performs an ArmSelection subroutine on each player, Property 1 ensures that for any player at epoch  $l^n$ :

$$\mathbb{P}(E_{l^n} | \mathcal{H}_{t^n}, \mathcal{A}, \neg E_{l^n}) \leq \eta \times f(l^n).$$

For the sake of simplicity, in the following we will omit the dependence on  $\mathcal{A}$  of probabilities.

The message  $\lambda_k^n$  is sent by player  $n$  as soon as the arm  $k$  is eliminated from  $\mathcal{K}^n(l^n)$  (see lines 17 – 18 algorithm 2). Hence, we have:

$$\mathbb{P}(E_{l^n} | \mathcal{M}_n, \neg E_{l^n}) = \mathbb{P}(E_{l^n} | \mathcal{H}_{t^n(l^n)}, \neg E_{l^n}) \leq \eta \times f(l^n),$$

where  $t^n(l^n)$  is the time where epoch  $l^n$  has begun.

To infer what arm is an  $\epsilon$ -optimal arm for player  $n$  on the basis of  $\mathcal{M}_n$  and  $\mathcal{A}$ , we first consider the favorable case for

the adversary, where player  $n$  has sent  $K - 1$  elimination messages which corresponds to epoch  $l^n = L$ . Using Property 1 of the subroutine used by  $\mathcal{A}$  and the set of messages  $\mathcal{M}_n$  the adversary can infer that:

$$\begin{aligned} \mathbb{P}(\{\mathcal{K}^n(L) \not\subseteq \mathcal{K}_\epsilon\} | \neg E_{L-1}) &= \sum_{l^n=1}^L \mathbb{P}(E_{l^n} | \mathcal{M}_n, \neg E_{l^n}) \\ &\leq \eta \sum_{l^n=1}^L f(l^n) = \eta. \end{aligned}$$

The previous equality holds since if at epoch  $l^n$  the event  $\{\mathcal{K}^n(l^n) \not\subseteq \mathcal{K}_\epsilon\}$  holds, then it holds also for all following epochs. Then the inequality is obtained by applying Property 1 to each element of the sum. Hence, if  $l^n = L$  knowing the set of messages  $\mathcal{M}_n$  and Property 1, the adversary cannot infer what arm is an  $\epsilon$ -optimal arm for player  $n$  with a probability higher than  $1 - \eta$ .

Otherwise if  $l^n < L$  then  $\mathcal{K}^n(L) \subset \mathcal{K}^n(l^n)$ , which implies that:

$$\begin{aligned} \mathbb{P}(\{\mathcal{K}^n(l^n) \not\subseteq \mathcal{K}_\epsilon\} | \mathcal{M}_n, \neg E_{l^n}) \\ \geq \mathbb{P}(\{\mathcal{K}^n(L) \not\subseteq \mathcal{K}_\epsilon\} | \mathcal{M}_n, \neg E_{L-1}). \end{aligned}$$

Hence, if  $l^n < L$  the adversary cannot infer what arm is an  $\epsilon$ -optimal arm with a probability higher than  $1 - \eta$ .

**Part 2: Low probability of failure.** An arm is eliminated when the events  $\{k \notin \mathcal{K}^n(l^n)\}$  occur for  $\lfloor \frac{\log \delta}{\log \eta} \rfloor$  independent players. Assumption 3 ( $\forall n \in \mathcal{N}, P_x(x = n) \neq 0$ ) and Property 2 ensures that it exists a time  $t = \sum_{n=1}^N t^n$  such that for  $K - 1$  arms, there are  $\lfloor \frac{\log \delta}{\log \eta} \rfloor$  voting players. Moreover, Property 1 implies that  $\forall n \in \mathcal{N}, \forall l^n$ :

$$\mathbb{P}(\{\mathcal{K}^n(l^n) \not\subseteq \mathcal{K}_\epsilon\} | \mathcal{M}_n, \neg E_{l^n}) \leq \eta \times f(l^n).$$

Hence, the  $\lfloor \frac{\log \delta}{\log \eta} \rfloor$  independent voting players eliminate the  $\epsilon$ -optimal arm with a probability at most:

$$\mathbb{P}(\{\mathcal{K}(l) \not\subseteq \mathcal{K}_\epsilon\} | \mathcal{M}, \neg E_l) \leq (\eta \times f(l))^{\lfloor \frac{\log \delta}{\log \eta} \rfloor},$$

where  $\mathcal{K}(l)$  denotes the shared set of remaining arms at elimination epoch  $l$  (see line 7 of Algorithm 2), and  $\mathcal{M} = \mathcal{M}_1 \cup \mathcal{M}_2 \cup \dots \cup \mathcal{M}_N$ .

If the algorithm fails, then the following event occurs : at stopping time,  $\exists k \in \mathcal{K}(L), k \notin \mathcal{K}_\epsilon$ . Using the union bound, we have:

$$\begin{aligned} \mathbb{P}(\{\mathcal{K}(L) \not\subseteq \mathcal{K}_\epsilon\} | \mathcal{M}, \neg E_{L-1}) &\leq \sum_{l=1}^L (\eta \times f(l))^{\lfloor \frac{\log \delta}{\log \eta} \rfloor} \\ &\leq \eta^{\lfloor \frac{\log \delta}{\log \eta} \rfloor}. \end{aligned}$$

Finally notice that:

$$\eta^{\lfloor \frac{\log \delta}{\log \eta} \rfloor} \leq \delta = \eta^{\frac{\log \delta}{\log \eta}} \leq \eta^{\lceil \frac{\log \delta}{\log \eta} \rceil}.$$

**Part 3: Low communication cost.** The index of each arm is sent to other players no more than once per player (see line 17 of the algorithm 2). When  $\lfloor \frac{\log \delta}{\log \eta} \rfloor$  messages have been sent for an arm, this arm is eliminated for all players (see lines 4 – 9 of the algorithm 2).

Thus  $\lfloor \frac{\log \delta}{\log \eta} \rfloor (K - 1)$  messages are sent to eliminate the suboptimal arms. Then, at most  $\lfloor \frac{\log \delta}{\log \eta} \rfloor - 1$  messages have been sent for the remaining arm. Thus, the number of sent messages is at most  $\lfloor \frac{\log \delta}{\log \eta} \rfloor K - 1$ . □

**Theorem 2.** *Using any ArmSelection( $\epsilon, \eta, \mathcal{K}$ ) subroutine, with a probability higher than  $(1 - \delta) (1 - I_{1-p^*}(T_{P_{x,y}} - T_{P_y}, 1 + T_{P_y}))^{\lfloor \frac{\log \delta}{\log \eta} \rfloor}$  DECENTRALIZED ELIMINATION stops after:*

$$\mathcal{O} \left( \frac{1}{p^*} \left( T_{P_y} + \sqrt{\frac{1}{2} \log \frac{1}{\delta}} \right) \right) \text{ samples in } P_{x,y},$$

where  $I_a(b, c)$  denotes the incomplete beta function evaluated at  $a$  with parameters  $b, c$ .

*Proof.* Let  $T_n$  be the number of samples of player  $n$  at time  $T_{P_{x,y}}$  when the algorithm stops.  $T_n$  is a binomial law of parameters  $T_{P_{x,y}}, P_x(x = n)$ . We have:

$$\mathbb{E}_{P_x}[T_n] = P_x(x = n) T_{P_{x,y}}.$$

Let  $\mathcal{B}_{\delta, \eta}$  be the set of players that have the  $\lfloor \frac{\log \delta}{\log \eta} \rfloor$  highest  $T_n$ . The algorithm does not stop, if the following event occurs:  $E_1 = \{\exists n \in \mathcal{B}_{\delta, \eta}, T_n < T_{P_y}\}$ .

Applying Hoeffding inequality, we have:

$$\mathbb{P}(T_n - P_x(x = n) T_{P_{x,y}} \leq -\epsilon) \leq \exp(-2\epsilon^2)$$

When  $\neg E_1$  occurs,  $\forall n \in \mathcal{B}_{\delta, \eta}$  we have with a probability at most  $\delta$ :

$$T_{P_y} - P_x(x = n) T_{P_{x,y}} \leq -\sqrt{\frac{1}{2} \log \frac{1}{\delta}}.$$

Then, when  $\neg E_1$  occurs we have with a probability at most  $\delta$ :

$$T_{P_{x,y}} \geq \frac{1}{p_{\delta, \eta}} \left( T_{P_y} + \sqrt{\frac{1}{2} \log \frac{1}{\delta}} \right),$$

where  $p_{\delta, \eta} = \min_{n \in \mathcal{B}_{\delta, \eta}} P_x(x = n)$ .

Finally if  $E_1$  does not occur, then we have with a probability at least  $1 - \delta$ :

$$T_{P_{x,y}} \leq \frac{1}{p_{\delta, \eta}} \left( T_{P_y} + \sqrt{\frac{1}{2} \log \frac{1}{\delta}} \right).$$

Let  $\mathcal{N}_M$  bet the set of the  $M = \lfloor \frac{\log \delta}{\log \eta} \rfloor$  most likely players. Let  $n^* = \arg \min_{n \in \mathcal{N}_M} P_x(x = n)$ , and  $p^* = \min_{n \in \mathcal{N}_M} P_x(x = n)$ .

Now, we consider the following event:  $E_2 = \{n^* \notin \mathcal{B}_{\delta, \eta}\}$ . By the definition of  $\mathcal{B}_{\delta, \eta}$ , the event  $E_2$  is equivalent to the event  $\{T_{n^*} < T_{P_y}\}$ . Then, we have:

$$\mathbb{P}(T_{n^*} < T_{P_y}) = I_{1-p^*}(T_{P_{x,y}} - T_{P_y}, 1 + T_{P_y}),$$

where  $I_a(b, c)$  denotes the incomplete beta function evaluated at  $a$  with parameters  $b, c$ .

Finally, with a probability at least  $(1 - I_{1-p^*}(T_{P_{x,y}} - T_{P_y}, 1 + T_{P_y}))^{\lfloor \frac{\log \delta}{\log \eta} \rfloor}$ , we have  $p_{\delta, \eta} = p^*$ .  $\square$

**Corollary 1.** *With a probability higher than  $(1 - \delta)(1 - I_{1-p^*}(T_{P_{x,y}} - T_{P_y}, 1 + T_{P_y}))^{\lfloor \frac{\log \delta}{\log \eta} \rfloor}$  DECENTRALIZED MEDIAN ELIMINATION stops after:*

$$\mathcal{O}\left(\frac{1}{p^*} \left( \frac{K}{\lfloor \frac{\log \delta}{\log \eta} \rfloor \epsilon^2} \log \frac{1}{\delta} + \sqrt{\frac{1}{2} \log \frac{1}{\delta}} \right)\right) \text{ samples in } P_{x,y}.$$

*Proof.* We have:

$$\begin{aligned} \eta^{\lfloor \frac{\log \delta}{\log \eta} \rfloor} &\leq \delta = \eta^{\frac{\log \delta}{\log \eta}} \leq \eta^{\lfloor \frac{\log \delta}{\log \eta} \rfloor} \\ \Rightarrow \frac{1}{\delta} &\geq \frac{1}{\eta^{\lfloor \frac{\log \delta}{\log \eta} \rfloor}} \\ \Leftrightarrow \log \frac{1}{\eta} &\leq \frac{1}{\lfloor \frac{\log \delta}{\log \eta} \rfloor} \log \frac{1}{\delta} \end{aligned}$$

MEDIAN ELIMINATION algorithm (Even-Dar et al, 2006) finds an  $\epsilon$ -optimal arm with a probability at least  $1 - \eta$ , and needs at most:

$$T_{P_y} = \mathcal{O}\left(\frac{K}{\epsilon^2} \log \frac{1}{\eta}\right) \leq \mathcal{O}\left(\frac{K}{\lfloor \frac{\log \delta}{\log \eta} \rfloor \epsilon^2} \log \frac{1}{\delta}\right) \text{ samples in } P_y$$

Then the use of Theorem 2 finishes the proof.  $\square$

**Corollary 2.** *With a probability higher than  $(1 - \delta)(1 - I_{1-p^*}(T_{P_{x,y}} - T_{P_y}, 1 + T_{P_y}))^{\lfloor \frac{\log \delta}{\log \eta} \rfloor}$  DECENTRALIZED SUCCESSIVE ELIMINATION stops after:*

$$\mathcal{O}\left(\frac{1}{p^*} \left( \frac{K}{\epsilon^2} \left( \log K + \frac{1}{\lfloor \frac{\log \delta}{\log \eta} \rfloor} \log \frac{1}{\delta} \right) + \sqrt{\frac{1}{2} \log \frac{1}{\delta}} \right)\right)$$

*samples in  $P_{x,y}$ .*

*Proof.* SUCCESSIVE ELIMINATION algorithm (Even-Dar et al, 2006) finds an  $\epsilon$ -optimal arm with a probability at least  $1 - \eta$ , and needs at most:

$$T_{P_y} = \mathcal{O}\left(\frac{K}{\epsilon^2} \log \frac{K}{\eta}\right) \leq \mathcal{O}\left(\frac{K}{\epsilon^2} \left( \log K + \frac{1}{\lfloor \frac{\log \delta}{\log \eta} \rfloor} \log \frac{1}{\delta} \right)\right)$$

samples in  $P_{x,y}$ . Then the use of Theorem 2 finishes the proof.  $\square$

**Theorem 3.** *For  $K \geq 2$ ,  $\delta \in (0, 0.5]$ , for the sequences of rewards where Assumption 4 holds, DSER3 is an  $(\epsilon, \eta)$ -private algorithm, that exchanges at most  $\lfloor \frac{\log \delta}{\log \eta} \rfloor K - 1$  messages, that finds an  $\epsilon$ -optimal arm with a probability at least  $(1 - \delta)(1 - I_{1-p^*}(T_{P_{x,y}} - T_{P_y}, 1 + T_{P_y}))^{\lfloor \frac{\log \delta}{\log \eta} \rfloor}$ , and that stops after:*

$$\mathcal{O}\left(\frac{1}{p^*} \left( \frac{K}{\epsilon^2} \left( \log K + \frac{1}{\lfloor \frac{\log \delta}{\log \eta} \rfloor} \log \frac{1}{\delta} \right) + \sqrt{\frac{1}{2} \log \frac{1}{\delta}} \right)\right)$$

*samples in  $P_{x,y}$ .*

*Proof.* Theorem 3 is a straightforward application of Theorem 2, where  $T_{P_y}$  is stated in Theorem 1 (Allesiardo et al, 2017).  $\square$

**Theorem 4.** *For  $K \geq 2$ ,  $\epsilon \geq \frac{\eta}{K}$ ,  $\varphi \in (0, 1]$ , for any sequences of rewards that can be splitted into sequences where Assumption 4 holds, DSER4 is an  $(\epsilon, \eta)$ -private algorithm, that exchanges on average at most  $\varphi T (\lfloor \frac{\log \delta}{\log \eta} \rfloor K - 1)$  messages, and that plays, with an expected probability at most  $\delta + \varphi T I_{1-p^*}(T_{P_{x,y}} - T_{P_y}, 1 + T_{P_y})^{\lfloor \frac{\log \delta}{\log \eta} \rfloor}$ , a suboptimal arm on average no more than:*

$$\mathcal{O}\left(\frac{1}{p^*} \left( \frac{1}{\epsilon^2} \sqrt{\frac{SK \log K + \frac{1}{\lfloor \frac{\log \delta}{\log \eta} \rfloor} \log \frac{1}{\delta}}{\delta^{\lfloor \frac{\log \delta}{\log \eta} \rfloor}}} + \sqrt{\frac{1}{2} \log \frac{1}{\delta}} \right)\right)$$

*times, where  $S$  is the number of switches of best arms,  $\varphi$  is the probability of reset in SER4,  $T$  is the time horizon, and the expected values are taken with respect to the randomization of resets.*

*Proof.* The upper bound of the expected number of times a suboptimal arm is played by SER4, is stated in Corollary 2 (Allesiardo et al, 2017). Then this upper bound is used in Theorem 2 to state the upper bound of the expected number of times a suboptimal arm is played using DSER4. The expected number of resets is  $\varphi T$ . Theorem 2 provides the success probability of each run of DECENTRALIZED ELIMINATION, which states the expected failure probability of DSER4. Then using Theorem 1 the expected upper bound of the number of exchanged messages is stated.  $\square$
